# Supplementary material for: Enhancement in Photoelectrochemical Performance of Optimized Amorphous SnS2 Thin Film Fabricated through Atomic Layer Deposition
Source: MDPI journal article supplement (doi:10.3390/nano9081083), 2019-07-28
Supplement: s1 [file s1]

## Supplementary materials

# Enhancement in Photoelectrochemical Performance of Optimized Amorphous SnS<sub>2</sub> Thin Film Fabricated Through Atomic Layer Deposition

Weiguang Hu <sup>1</sup>, Truong Thi Hien <sup>2</sup>, Dojin Kim <sup>2</sup>, Hyo Sik Chang <sup>1,\*</sup>

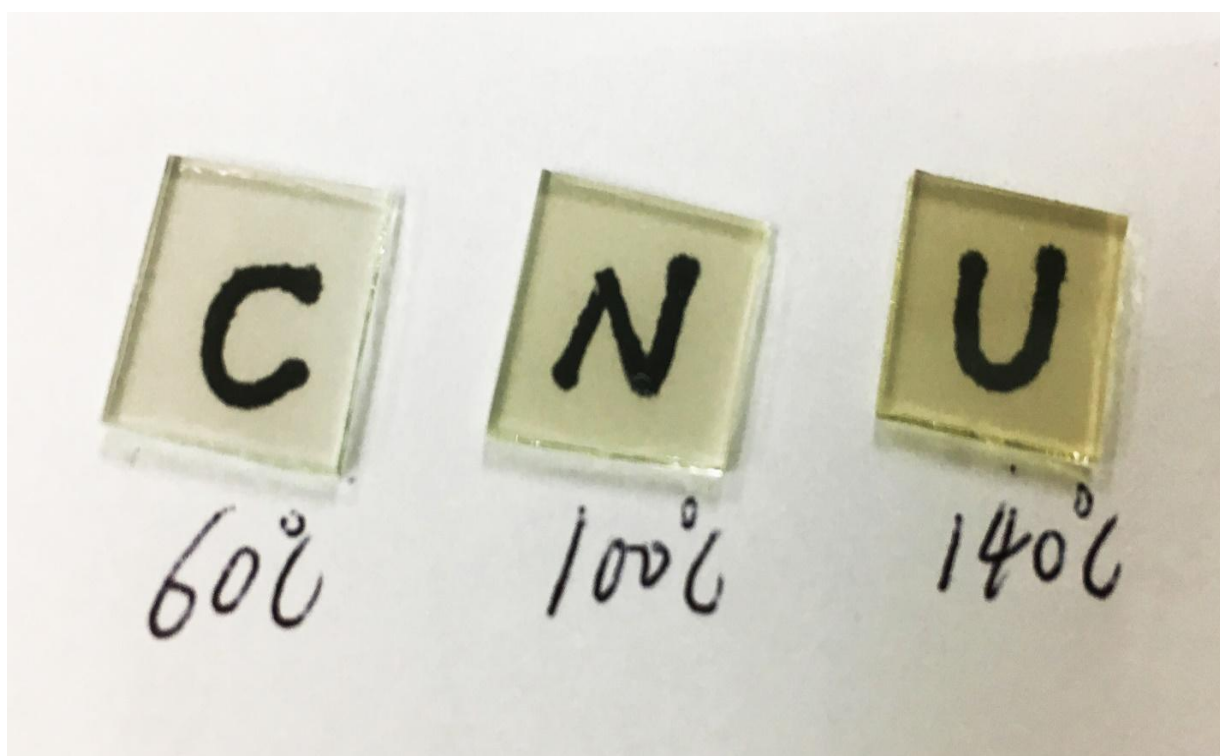

**Figure S1.** Photos of 50-nm-thick SnS<sub>2</sub> films which in the growth of the glass substrates at different deposition temperatures. The C, N, and U represent the deposition temperature of 60, 100, and 140 °C, respectively. All of them are pale yellow and the color deepens with the increase of deposition temperature.

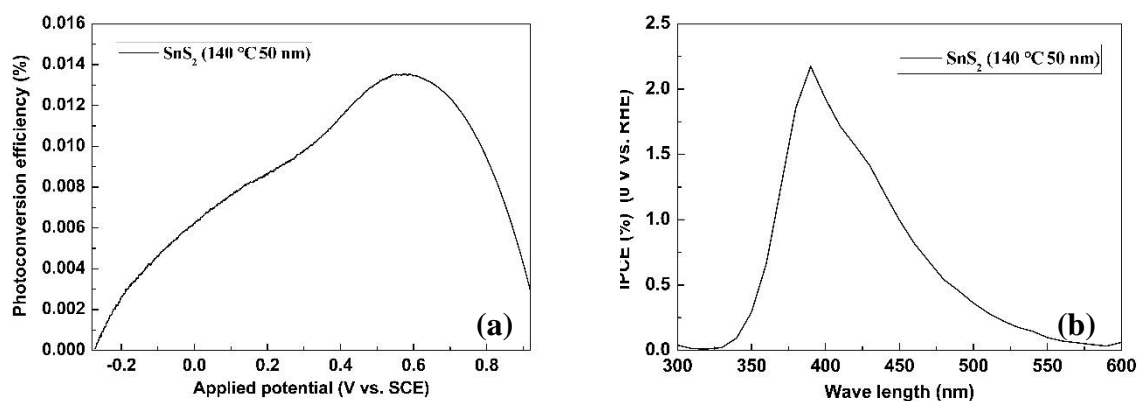

**Figure S2.** Photoconversion efficiency **(a)** and IPCE curve **(b)** of the 50-nm-thick SnS<sub>2</sub> film deposited at 140 °C. Photoconversion efficiency was measured as a function of applied potential (vs. SCE) under illumination. The maximum efficiency (0.014%) was identified at ~0.553 V of bias (vs. SCE). The highest IPCE value was up to 2.17% at 390 nm (0 V vs. RHE).

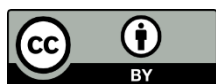

© 2019 by the authors. Submitted for possible open access publication under the terms and conditions of the Creative Commons Attribution (CC BY) license (<http://creativecommons.org/licenses/by/4.0/>).
